# Supplementary material for: Genome-Wide Identification and Characterisation of Cytokinin-O-Glucosyltransferase (CGT) Genes of Rice Specific to Potential Pathogens
Source: MDPI journal article supplement (doi:10.3390/plants11070917), 2022-03-29
Supplement: s1 [file s1]

Supplementary Material

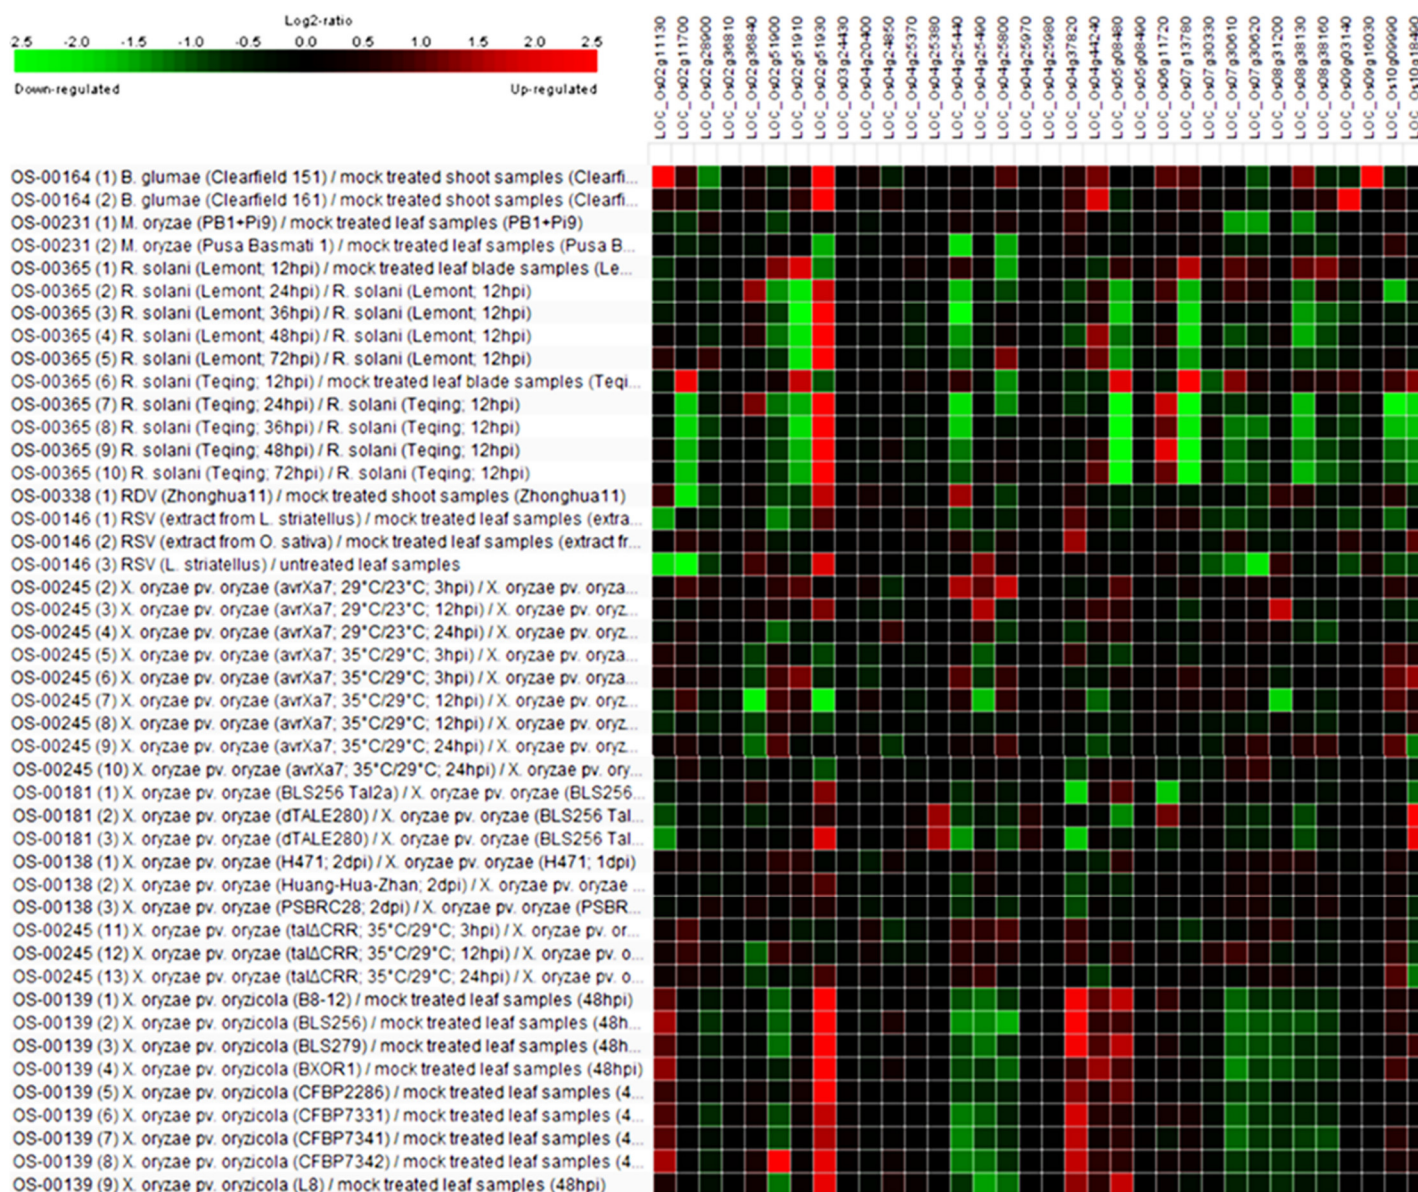

**Figure S1.** In silico (Genevestigator) deduced differential expressions of up-and downregulated cytokinin-Oglucosyltransferase (CGT) genes of rice in response to infections with *Rhizoctonia solani*, *Magnaporthe oryzae*, *Xanthomonas oryzae* pv. *oryzae*, and *Xanthomonas oryzae* pv. *oryzicola*. Downregulation is indicated by green colour and upregulation by red colour.

**Table S1.** Primers used in PCR assay to assess the expressions of CGT genes in on challenge inoculation with *M. oryzae*, *Xoo* and *R. solani*.

| Gene                  | Primers | Sequence (5'-3')       |
|-----------------------|---------|------------------------|
| <i>LOC_Os04g25440</i> | CGT-F   | GGACGCACACGTAACAGTAA   |
|                       | CGT -R  | GTCAAGTCATGGAGGCAAGT   |
| <i>LOC_Os04g25800</i> | CGT -F  | TGCACAAGAGTGGAAGAGAA   |
|                       | CGT -R  | CTCACCATTCCACCCTGCTAAT |
| <i>LOC_Os04g25490</i> | CGT -F  | TGGACACGAAGATGGATTGG   |
|                       | CGT-R   | CGTCACGTCGATGAAGAAGT   |
| <i>LOC_Os04g37820</i> | CGT -F  | GACGCATACAGAGACATGGG   |

---

|                         |        |                         |
|-------------------------|--------|-------------------------|
|                         | CGT-R  | GTTGACGAAGGTGATGTGGA    |
| <i>LOC_Os07g30620.1</i> | CGT -F | CTAATCAGGCATATCTTCCCCAC |
|                         | CGT -R | TCACCCAAGTCGTTGTAGAAAG  |
| <i>LOC_Os07g30610.1</i> | CGT-F  | GTATCAACACCTTCCACCCC    |
|                         | CGT-R  | GATCTTGTACACGCCTAGAGG   |

---
